# Supplementary material for: In situ nitrogen-doped nanoporous carbon nanocables as an efficient metal-free catalyst for oxygen reduction reaction
Source: Royal Society of Chemistry journal article supplement (doi:10.1039/c4ta01780c), 2014-01-01
Supplement: c4ta01780c1.pdf [file c4ta01780c1.pdf]

**Electronic Supplementary Information (ESI) for**

**In-situ nitrogen-doped nanoporous carbon nanocables as an  
efficient metal-free catalyst for oxygen reduction reaction**

Wen-Jie Jiang,<sup>a,b</sup> Jin-Song Hu,<sup>\*a</sup> Xing Zhang,<sup>a</sup> Yan Jiang,<sup>a</sup> Bin-Bin Yu,<sup>a</sup> Zi-Dong Wei,<sup>\*b</sup> and Li-Jun Wan<sup>\*a</sup>

<sup>a</sup> Beijing National Laboratory for Molecular Sciences, Key Laboratory of Molecular Nanostructure and Nanotechnology, Institute of Chemistry, Chinese Academy of Science, 2 North 1<sup>st</sup> Street, Zhongguancun, Beijing 100190, China.

<sup>b</sup> State Key Laboratory of Power Transmission Equipment & System Security and New Technology, College of Chemistry and Chemical Engineering, Chongqing University, Chongqing 400044, China.

E-mail: hujs@iccas.ac.cn, zdwei@cqu.edu.cn, wanlijun@iccas.ac.cn,

This Electronic Supplementary Material includes:

Supplementary Figures S1-S4, Table S1-S2

Supplementary References

**Fig. S1.** SEM image (a), TEM image (b) and High-resolution TEM image (c) of CNT@NPC-800. SEM image (d), TEM image (e) and High-resolution TEM image (f) of CNT@NPC-1000.

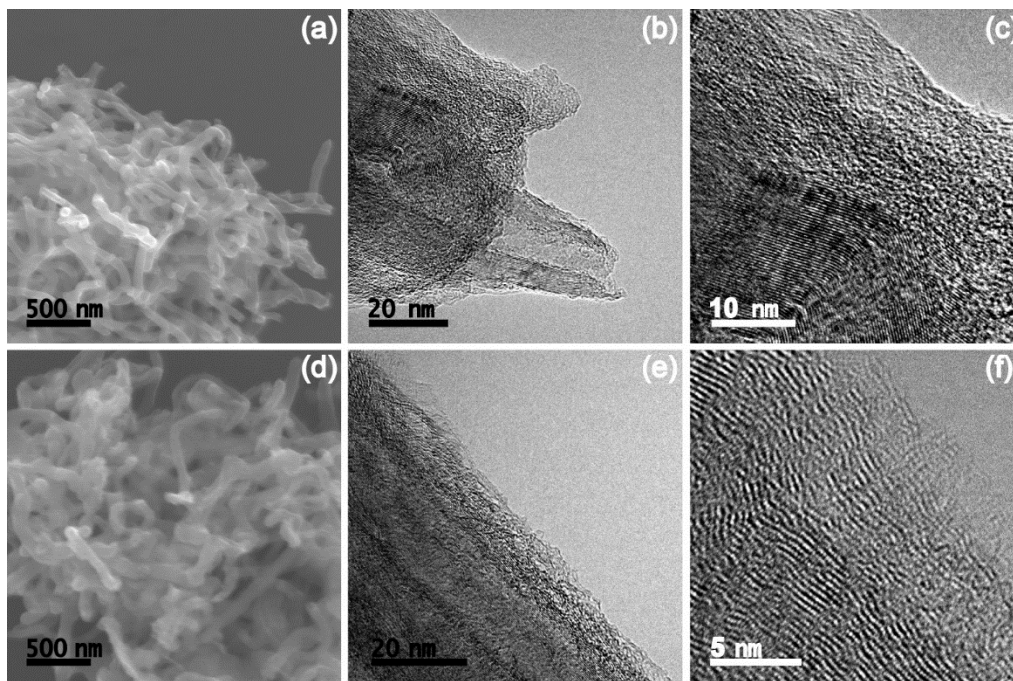

**Fig. S2.** Typical TEM image of CNT@NPC obtained after hydrothermal synthesis but before pyrolysis. The exposed CNT tips marked in orange circles could enhance the role of three-dimensional conductive network of CNTs in catalysts and facilitate the electron migration.

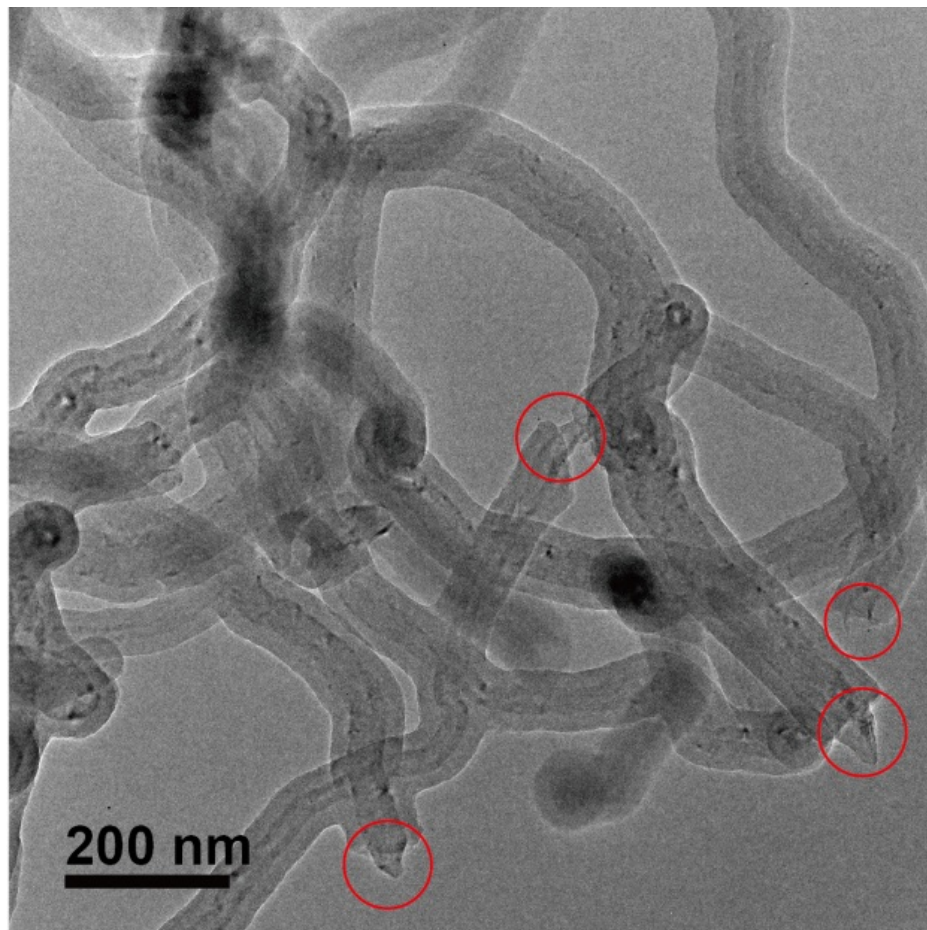

**Fig. S3.** N<sub>2</sub> adsorption-desorption isotherms of acid purified CNTs (a), CNT@NPC-800 (c), and CNT@NPC-1000 (e). Pore size distribution of CNTs (b), CNT@NPC-800 (d), and CNT@NPC-1000 (f) from analysis of the desorption branch using the Barrett-Joyner-Halenda (BJH) method.

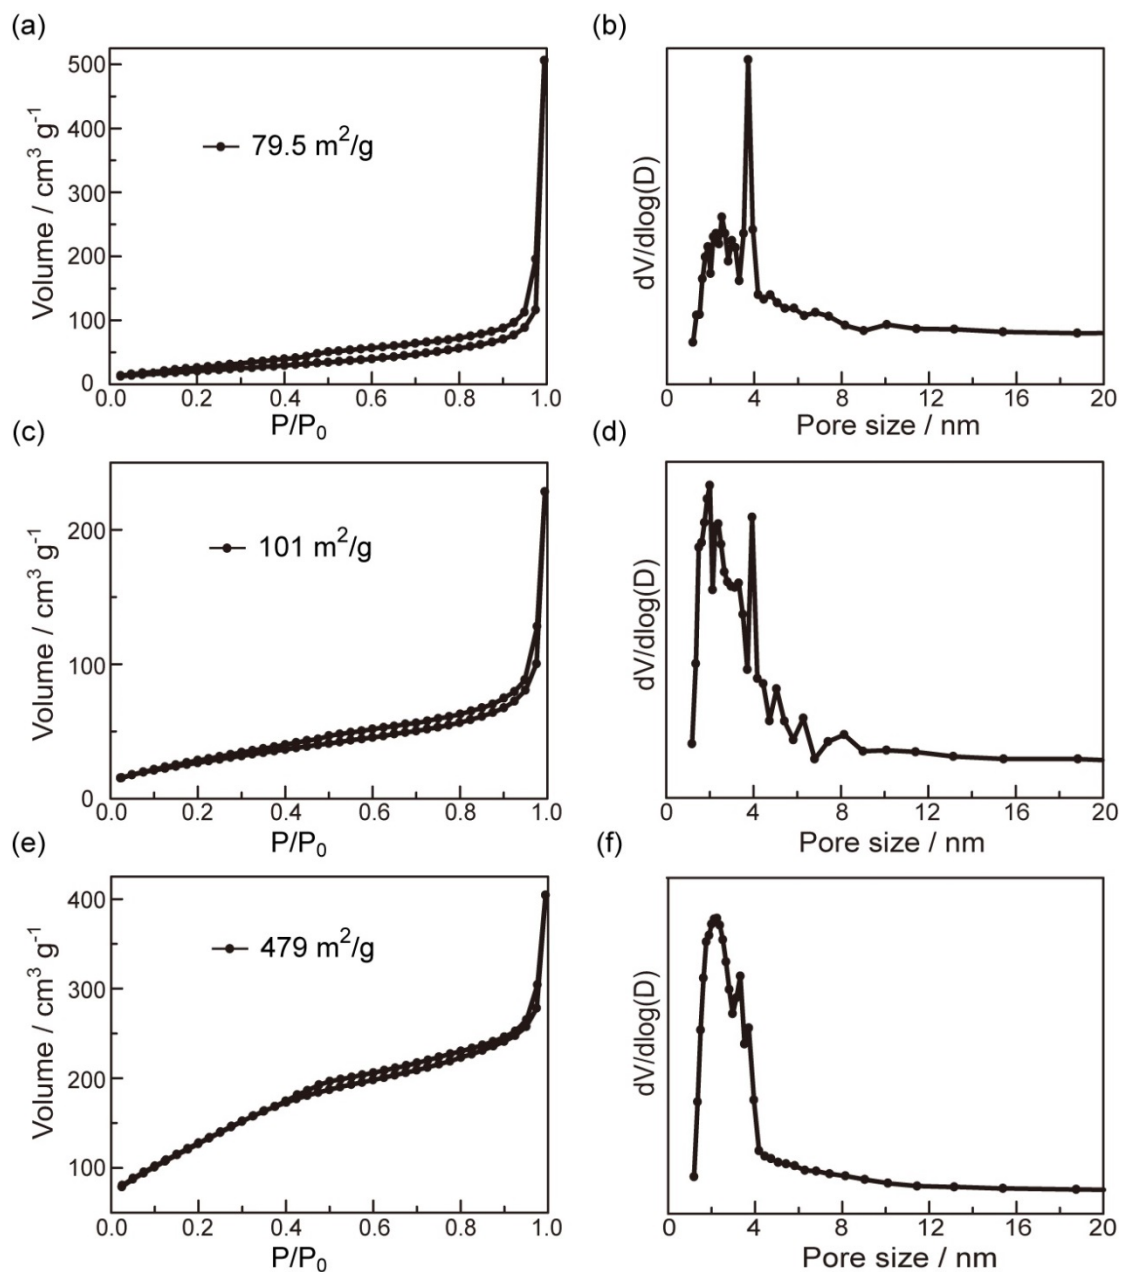

**Fig. S4.** LSV curves recorded in O<sub>2</sub>-saturated 0.1 M KOH solution at various rotating speeds for CNT@NPC-800 (a), CNT@NPC-900 (c), CNT@NPC-1000 (e), and commercial Pt/C (g). Koutecky-Levich plots at various potentials for CNT@NPC-800 (b), CNT@NPC-900 (d), CNT@NPC-1000 (f), and commercial Pt/C (h).

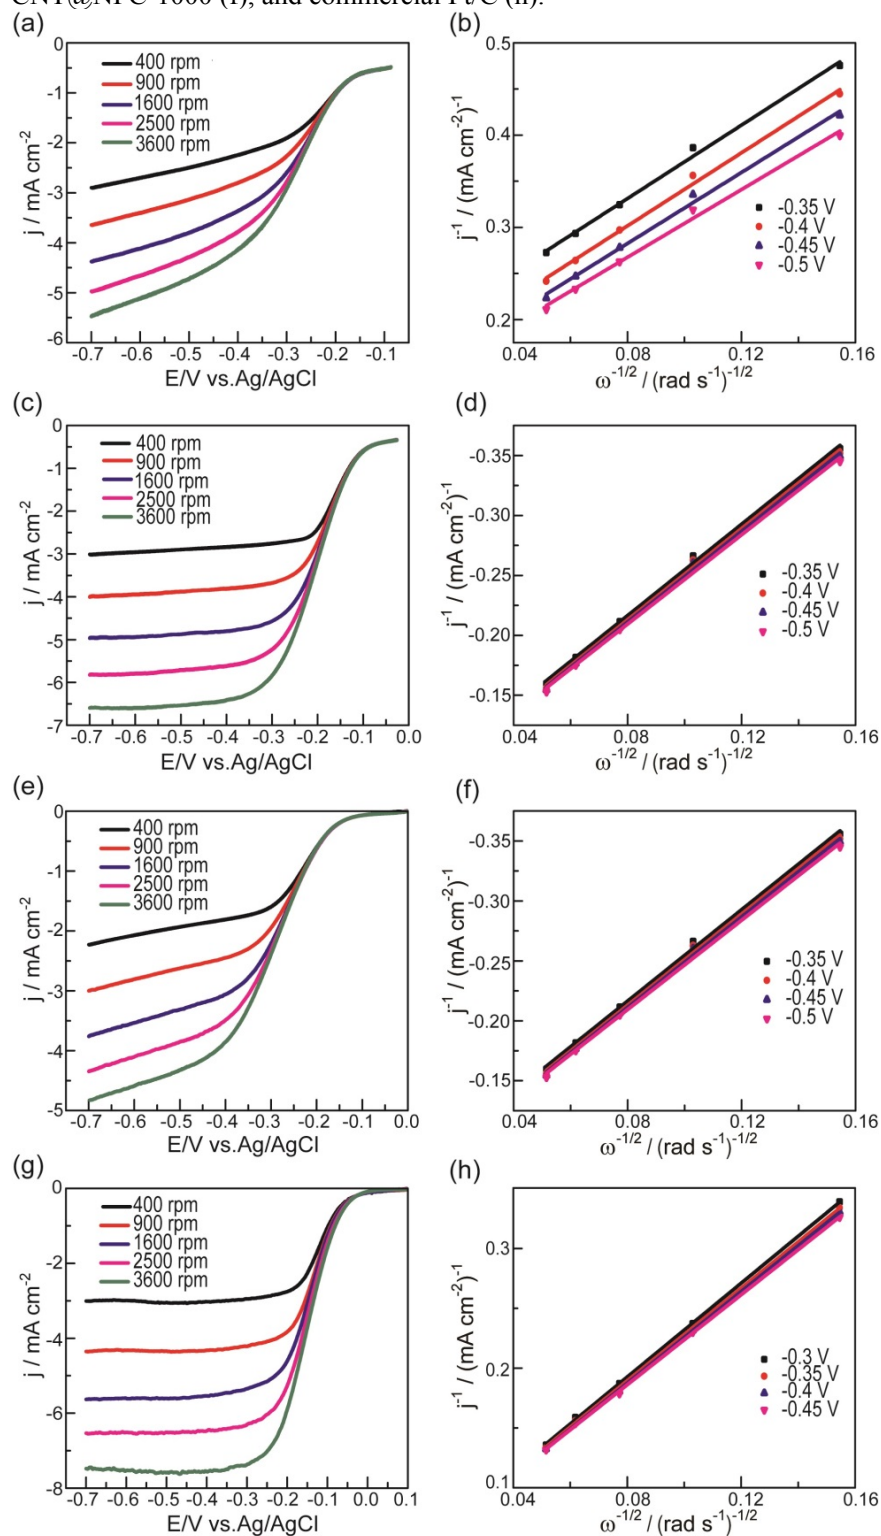

**Table S1.** Binding energy position of pyridinic type, pyrrolic type, and quaternary type nitrogen used in the deconvolution of the XPS N1s peaks of CNT@NPCs shown in Fig. 2. [S2]

|              | pyridinic-N<br>(eV) | pyrrolic-N<br>(eV) | quaternary-N<br>(eV) |
|--------------|---------------------|--------------------|----------------------|
| CNT@NPC-800  | 398.32              | 399.51             | 400.72               |
| CNT@NPC-900  | 398.07              | 398.93             | 400.83               |
| CNT@NPC-1000 | 398.51              |                    | 400.97               |

**Table S2.** Comparison of electrocatalytic activity of CNT@NPC-900 with other metal-free carbon materials previously reported in literatures measured in 0.1 M KOH solution. The potential is versus Ag/AgCl unless specifically noted.

| Catalysts                                             | Onset potential (V) | Cathodic ORR peak (V) | Half-wave potential (V) | Mass current density <sup>[a]</sup> (mA/mg) | References                                           |
|-------------------------------------------------------|---------------------|-----------------------|-------------------------|---------------------------------------------|------------------------------------------------------|
| CNT@NPC-900                                           | -0.114              | -0.253                | -0.184                  | 8.43 at -0.2 V<br>38.5 at -0.2 V            | this work                                            |
| Commercial JM Pt/C                                    | -                   | -                     | -0.142                  | 11.9 at -0.1 V                              | this work                                            |
| N-doped graphene dots                                 | -0.16               | -0.27                 | -0.363                  | ~1.5                                        | <i>J. Am. Chem. Soc.</i> <b>2012</b> , 134, 15       |
| Polyelectrolyte-functionalized graphene               | -0.15               | -0.35                 | -0.372                  | -                                           | <i>ACS Nano</i> <b>2011</b> , 5, 6202                |
| Polyaniline-derived N- and O-doped mesoporous carbons | -0.095              | -0.553                | -0.342                  | ~0.94                                       | <i>J. Am. Chem. Soc.</i> <b>2013</b> , 135, 7823     |
| Edge-halogenated graphene nanoplatelets               | -0.14               | -0.22                 | -0.345                  | ~4.67                                       | <i>Sci. Rep.</i> <b>2013</b> , 3, 1810               |
| Vertically aligned BCN nanotubes                      | -0.009              | -0.295                | -0.219                  | -                                           | <i>Angew. Chem. Int. Ed.</i> <b>2011</b> , 50, 11756 |
| BCN graphene                                          | -0.055              | -0.323                | -0.245                  | -                                           | <i>Angew. Chem. Int. Ed.</i> <b>2012</b> , 51, 4209  |
| N-doped carbon sub-micrometer spheres                 | -0.1                | -0.218                | -0.247                  | 2.5 at -0.2 V                               | <i>Adv. Mater.</i> <b>2013</b> , 7, 998              |
| Sulfur and nitrogen doped carbon aerogels             | -0.13               | -0.341                | -0.289                  | 1.14 at -0.2 V                              | <i>Green Chem.</i> <b>2012</b> , 14, 1515            |

[a] The data in this column may be influenced by the difference in system configuration. The value is obtained from measured current density divided by catalysts loading.

**Supplementary reference:**

- [S1] S. Wang, D. Yu, L. Dai, D. W. Chang, J.-B. Baek, *ACS Nano* **2011**, *5*, 6202-6209.
- [S2] L. Lai, J. R. Potts, D. Zhan, L. Wang, C. K. Poh, C. Tang, H. Gong, Z. Shen, J. Lin, R. S. Ruoff, *Energy Environ. Sci.* **2012**, *5*, 7936-7942
